# Supplementary material for: Parental smoking is associated with adolescent loneliness: evidence from 71 low- and middle-income countries
Source: Frontiers journal article supplement (doi:10.3389/fpubh.2025.1497136), 2025-02-26
Supplement: Data_Sheet_1.pdf [file Data_Sheet_1.pdf]

**Table S1 Distributions of analyses' covariates by sex, age, and WHO region.**

|                          | Low<br>socioeconomic<br>status | Sufficient<br>physical activity | Having close<br>friends | Parental<br>understanding | Frequency of tobacco use in the<br>past 30 days |                 |                | Frequency of drinking alcohol in<br>the past 30 days |                  |                |
|--------------------------|--------------------------------|---------------------------------|-------------------------|---------------------------|-------------------------------------------------|-----------------|----------------|------------------------------------------------------|------------------|----------------|
|                          |                                |                                 |                         |                           | Never                                           | 0-9 days        | ≥10 days       | Never                                                | 0-9 days         | ≥10 days       |
| Total                    | 10,366<br>(6.4)                | 28,706<br>(15.6)                | 164,723<br>(94.3)       | 67,852<br>(37.2)          | 145,355<br>(90.0)                               | 15,438<br>(7.8) | 5,099<br>(2.1) | 99,458<br>(90.0)                                     | 26,358<br>(9.2)  | 3,345<br>(0.8) |
| Sex                      |                                |                                 |                         |                           |                                                 |                 |                |                                                      |                  |                |
| Boys                     | 5,110<br>(6.8)                 | 16,617<br>(18.5)                | 77,057<br>(94.4)        | 31,342<br>(36.8)          | 64,942<br>(85.9)                                | 8,947<br>(11.2) | 3,404<br>(3.3) | 45,307<br>(89.0)                                     | 12,227<br>(10.0) | 1,676<br>(1.0) |
| Girls                    | 5,256<br>(6.0)                 | 12,089<br>(12.6)                | 87,666<br>(94.3)        | 36,510<br>(40.1)          | 80,413<br>(94.7)                                | 6,491<br>(4.4)  | 1,696<br>(0.9) | 54,151<br>(90.9)                                     | 14,131<br>(8.3)  | 1,669<br>(0.7) |
| Age groups,<br>years     |                                |                                 |                         |                           |                                                 |                 |                |                                                      |                  |                |
| 12-13                    | 3,620<br>(6.0)                 | 9,980<br>(14.5)                 | 57,442<br>(94.6)        | 24,680<br>(38.9)          | 52,525<br>(92.4)                                | 4,224<br>(6.3)  | 960<br>(1.3)   | 37,545<br>(93.1)                                     | 5,982<br>(6.3)   | 660<br>(0.6)   |
| 14-15                    | 6,746<br>(6.7)                 | 18,726<br>(16.3)                | 107,281<br>(94.1)       | 43,172<br>(38.1)          | 92,830<br>(88.5)                                | 11,214<br>(8.8) | 4,139<br>(2.6) | 60,913<br>(87.9)                                     | 20,376<br>(11.1) | 2,685<br>(1.0) |
| WHO Region               |                                |                                 |                         |                           |                                                 |                 |                |                                                      |                  |                |
| Africa                   | 1,200<br>(10.0)                | 1,843<br>(18.3)                 | 9,279<br>(90.8)         | 3,899<br>(39.2)           | 8,693<br>(93.0)                                 | 825<br>(5.3)    | 289<br>(1.7)   | 6,914<br>(92.0)                                      | 1,503<br>(6.8)   | 183<br>(1.2)   |
| America                  | 1,971<br>(3.0)                 | 10,420<br>(16.2)                | 56,224<br>(94.2)        | 25,183<br>(41.8)          | 50,174<br>(86.4)                                | 5,826<br>(11.0) | 1,855<br>(2.6) | 33,899<br>(66.2)                                     | 19,631<br>(29.9) | 2,785<br>(3.9) |
| Eastern<br>Mediterranean | 3,358<br>(6.9)                 | 6,556<br>(12.8)                 | 39,999<br>(92.9)        | 17,420<br>(38.0)          | 35,324<br>(90.4)                                | 4,365<br>(7.6)  | 1,545<br>(2.0) | 4,945<br>(92.3)                                      | 436<br>(7.0)     | 56<br>(0.7)    |
| Southeast Asia           | 1,330                          | 3,996                           | 22,327                  | 9,748                     | 18,840                                          | 1,426           | 449            | 21,437                                               | 1,083            | 93             |

|                 |       |        |        |        |        |       |       |        |        |       |
|-----------------|-------|--------|--------|--------|--------|-------|-------|--------|--------|-------|
|                 | (6.0) | (19.0) | (95.3) | (40.9) | (90.6) | (7.1) | (2.2) | (95.9) | (3.8)  | (0.3) |
| Western Pacific | 2,507 | 5,891  | 36,894 | 11,602 | 32,324 | 2,996 | 961   | 32,263 | 3,705  | 228   |
|                 | (6.5) | (9.2)  | (95.9) | (29.4) | (88.4) | (9.7) | (1.9) | (85.4) | (14.2) | (0.4) |

---

Data are presented as number (percentage).

**Table S2 Prevalence of adolescent loneliness across different categories of parental smoking stratified by sex, age, and WHO region**

|                          | Parental smoking |             |             |           | <i>P</i> -value |
|--------------------------|------------------|-------------|-------------|-----------|-----------------|
|                          | Neither          | Father only | Mother only | Both      |                 |
| <b>Total, % (SE)</b>     | 10.1(0.3)        | 12.2(0.6)   | 15.8(1.3)   | 18.4(2.1) | <0.001          |
| <b>Sex</b>               |                  |             |             |           |                 |
| Boys, % (SE)             | 8.9(0.4)         | 10.2(0.9)   | 14.4(1.8)   | 19.7(3.2) | <0.001          |
| Girls, % (SE)            | 11.4(0.4)        | 14.4(0.8)   | 17.6(1.8)   | 16.9(1.7) | <0.001          |
| <b>Age groups, years</b> |                  |             |             |           |                 |
| 12-13, % (SE)            | 8.8(0.5)         | 10.1(0.8)   | 14.6(1.9)   | 18.8(3.0) | <0.001          |
| 14-15, % (SE)            | 10.9(0.3)        | 13.5(0.8)   | 16.5(1.7)   | 18.2(2.8) | <0.001          |
| <b>WHO region</b>        |                  |             |             |           |                 |
| Africa, % (SE)           | 8.7(0.6)         | 10.6(1.9)   | 18.4(5.2)   | 17.9(4.3) | 0.003           |
| America, % (SE)          | 9.8(0.4)         | 15.5(1.2)   | 23.0(2.7)   | 20.4(2.5) | <0.001          |

|                                  |           |           |           |           |        |
|----------------------------------|-----------|-----------|-----------|-----------|--------|
| Eastern Mediterranean, %<br>(SE) | 13.6(0.7) | 15.8(1.4) | 19.9(2.6) | 18.8(2.9) | 0.014  |
| South East-Asia, % (SE)          | 7.3(0.5)  | 8.4(0.6)  | 8.3(1.5)  | 17.7(4.5) | <0.001 |
| Western Pacific, % (SE)          | 12.9(0.8) | 13.9(0.8) | 13.6(3.1) | 19.1(2.7) | 0.107  |

---

SE=standard error.

Adolescent loneliness is defined as adolescents feeling lonely most of the time or always in the past 12 months.

**Table S3 Association between parental smoking and adolescent loneliness stratified by sex, age group, and WHO region**

|                         | Parental smoking |                  |                  |                  |
|-------------------------|------------------|------------------|------------------|------------------|
|                         | Neither          | Father only      | Mother only      | Both             |
| <b>Model 1</b>          |                  |                  |                  |                  |
| <b>Total</b>            | 1.00             | 1.26 (1.13-1.39) | 1.61 (1.34-1.94) | 2.09 (1.62-2.70) |
| <b>Sex</b>              |                  |                  |                  |                  |
| Boys                    | 1.00             | 1.19 (0.99-1.42) | 1.70 (1.29-2.25) | 2.69 (1.86-3.89) |
| Girls                   | 1.00             | 1.32 (1.17-1.49) | 1.52 (1.18-1.96) | 1.54 (1.21-1.95) |
| <b>Age group, years</b> |                  |                  |                  |                  |
| 12-13                   | 1.00             | 1.19 (1.03-1.38) | 1.66 (1.21-2.27) | 2.34 (1.69-3.22) |
| 14-15                   | 1.00             | 1.29 (1.14-1.47) | 1.59 (1.26-2.00) | 1.96 (1.36-2.83) |
| <b>WHO region</b>       |                  |                  |                  |                  |
| Africa                  | 1.00             | 1.35 (0.97-1.88) | 1.71 (0.93-3.13) | 2.29 (1.34-3.91) |
| America                 | 1.00             | 1.64 (1.35-1.99) | 2.89 (2.13-3.91) | 2.44 (1.67-3.56) |

|                         |      |                  |                  |                  |
|-------------------------|------|------------------|------------------|------------------|
| Eastern Mediterranean   | 1.00 | 1.21 (1.01-1.46) | 1.48 (1.05-2.08) | 1.48 (1.05-2.09) |
| South East-Asia         | 1.00 | 1.19 (1.01-1.41) | 1.25 (0.85-1.84) | 2.88 (1.63-5.10) |
| Western Pacific         | 1.00 | 1.13 (1.00-1.28) | 1.35 (0.86-2.13) | 1.69 (1.16-2.46) |
| <b>Model 2</b>          |      |                  |                  |                  |
| <b>Total</b>            | 1.00 | 1.26 (1.14-1.40) | 1.55 (1.28-1.90) | 1.93 (1.43-2.60) |
| <b>Sex</b>              |      |                  |                  |                  |
| Boys                    | 1.00 | 1.20 (1.00-1.44) | 1.57 (1.14-2.17) | 2.33 (1.54-3.52) |
| Girls                   | 1.00 | 1.29 (1.14-1.45) | 1.48 (1.15-1.91) | 1.50 (1.14-1.97) |
| <b>Age group, years</b> |      |                  |                  |                  |
| 12-13                   | 1.00 | 1.20 (1.03-1.39) | 1.72 (1.23-2.41) | 2.33 (1.59-3.41) |
| 14-15                   | 1.00 | 1.30 (1.14-1.48) | 1.49 (1.17-1.91) | 1.73 (1.13-2.64) |
| <b>WHO region</b>       |      |                  |                  |                  |
| Africa                  | 1.00 | 1.11 (0.73-1.67) | 1.63 (0.83-3.22) | 1.71 (0.97-3.03) |
| America                 | 1.00 | 1.51 (1.22-1.87) | 2.46 (1.78-3.42) | 2.07 (1.49-2.89) |

|                       |      |                  |                  |                  |
|-----------------------|------|------------------|------------------|------------------|
| Eastern Mediterranean | 1.00 | 1.25 (1.05-1.50) | 1.73 (1.21-2.48) | 1.54 (1.05-2.26) |
| South East-Asia       | 1.00 | 1.31 (1.08-1.58) | 1.15 (0.75-1.77) | 2.60 (1.33-4.93) |
| Western Pacific       | 1.00 | 1.07 (0.95-1.22) | 0.97 (0.57-1.65) | 1.49 (0.99-2.22) |

---

Data are presented as odds ratios (95% confidence intervals)

Adolescent loneliness is defined as adolescent feeling lonely most of the time or always in the past 12 months

Model 1: adjusted for age, sex, and socioeconomic status.

Model 2: Model 1 covariates plus additional adjustment for physical activity, having a close friend, survey year, country, and parental understanding.

*Note:* Hunger due to lack of food was not adjusted in Bhutan as this variable was not collected. Data on physical activity were not collected in Maldives and Malawi. Cambodia was not adjusted for parental understanding as these variables were not collected.

**Table S4 Associations between parental smoking and adolescent loneliness, stratified by frequency of tobacco use and alcohol consumption**

|                                                | N       | Parental smoking |                  |                  |                  | Proportion of mediation, % | P value |
|------------------------------------------------|---------|------------------|------------------|------------------|------------------|----------------------------|---------|
|                                                |         | Neither          | Father only      | Mother only      | Both             |                            |         |
| Frequency of tobacco use in the past 30 days   |         |                  |                  |                  |                  | 11.6                       | <0.001  |
| Never                                          | 145,355 | 1.00             | 1.21 (1.13-1.30) | 1.17 (0.91-1.50) | 1.49 (1.21-1.82) |                            |         |
| 1-9 days                                       | 15,438  | 1.00             | 0.97(0.76-1.24)  | 1.31(0.92-1.87)  | 1.67(0.98-2.85)  |                            |         |
| ≥10 days                                       | 5,099   | 1.00             | 0.84(0.46-1.51)  | 1.34 (0.60-2.99) | 1.57(0.74-3.31)  |                            |         |
| Frequency of drink alcohol in the past 30 days |         |                  |                  |                  |                  | 10.3                       | <0.001  |
| Never                                          | 99,458  | 1.00             | 1.15 (1.05-1.26) | 1.35 (1.00-1.82) | 1.54 (1.26-1.88) |                            |         |
| 1-9 days                                       | 26,358  | 1.00             | 1.12(0.93-1.35)  | 0.91(0.60-1.35)  | 1.21(0.84-1.75)  |                            |         |
| ≥10 days                                       | 3,345   | 1.00             | 1.49(0.57-3.90)  | 1.14(0.43-3.02)  | 2.82(0.79-10.01) |                            |         |

Data are presented as odds ratios (95% confidence intervals)

Model was adjusted for age, sex, socioeconomic status, physical activity, having a close friend, parental understanding, survey year, and country.

*Note:* Afghanistan, Bahrain, Egypt, Iraq, Kuwait, Morocco, Pakistan, Palestine, Qatar, United Arab Emirates, and Yemen did not collect information on alcohol consumption, and this variable was not considered for these countries. In addition, Myanmar did not collect information on tobacco use, and this variable was not considered for this country.

**Table S5 Sensitivity analysis of associations between parental smoking and adolescent loneliness\*, stratified by frequency of tobacco use and alcohol consumption**

|                                                |         | N    | Parental smoking |                  |                  |      | Proportion of mediation, % | P value |
|------------------------------------------------|---------|------|------------------|------------------|------------------|------|----------------------------|---------|
|                                                |         |      | Neither          | Father only      | Mother only      | Both |                            |         |
| Frequency of tobacco use in the past 30 days   |         |      |                  |                  |                  |      | 10.7                       | <0.001  |
| Never                                          | 145,355 | 1.00 | 1.28 (1.14-1.45) | 1.26 (0.95-1.66) | 1.46 (1.06-2.01) |      |                            |         |
| 1-9 days                                       | 15,438  | 1.00 | 0.93(0.67-1.28)  | 1.54(1.02-2.31)  | 2.09(1.01-4.33)  |      |                            |         |
| ≥ 10 days                                      | 5,099   | 1.00 | 1.03(0.57-1.87)  | 0.86(0.38-1.93)  | 1.46(0.79-2.69)  |      |                            |         |
| Frequency of drink alcohol in the past 30 days |         |      |                  |                  |                  |      | 20.4                       | 0.004   |
| Never                                          | 99,458  | 1.00 | 1.23 (1.08-1.39) | 1.39(1.06-1.83)  | 2.06 (1.31-3.24) |      |                            |         |
| 1-9 days                                       | 26,358  | 1.00 | 1.11(0.89-1.39)  | 0.91(0.56-1.47)  | 1.78(1.11-2.85)  |      |                            |         |
| ≥ 10 days                                      | 3,345   | 1.00 | 2.00(0.86-4.77)  | 2.91(0.95-8.91)  | 2.31(0.98-5.43)  |      |                            |         |

Data are presented as odds ratios (95% confidence intervals)

\* Adolescent loneliness is defined as adolescent feeling lonely most of the time or always in the past 12 months

Model was adjusted for age, sex, socioeconomic status, physical activity, having a close friend, parental understanding, survey year, and country.

*Note:* Afghanistan, Bahrain, Egypt, Iraq, Kuwait, Morocco, Pakistan, Palestine, Qatar, United Arab Emirates, and Yemen did not collect information on alcohol consumption, and this variable was not considered for these countries. In addition, Myanmar did not collect information on tobacco use, and this variable was not considered for this country.
